# Supplementary material for: A novel metal-free two-dimensional material for photocatalytic water splitting – phosphorus nitride (γ-PN)
Source: Royal Society of Chemistry journal article supplement (doi:10.1039/c7ra10305k), 2017-01-01
Supplement: c7ra10305k1.pdf [file c7ra10305k1.pdf]

## Supporting Information

### **A Novel Metal-free Two-Dimensional Material for Photocatalytic Water Splitting ----- Phosphorus Nitride ( $\gamma$ -PN)**

*Xiaohong Tan<sup>1</sup>, Yujin Ji<sup>2\*</sup>, Huilong Dong<sup>2</sup>, Meiyi Liu,<sup>3</sup> Tingjun Hou<sup>2</sup> and Youyong Li<sup>2\*</sup>*

*<sup>1</sup>College of Mechanical and Electrical Engineering, Hangzhou Polytechnic, Hangzhou 311402, China*

*<sup>2</sup>Institute of Functional Nano & Soft Materials (FUNSOM), Jiangsu Key Laboratory for Carbon-Based Functional Materials & Devices, Soochow University, Suzhou, 215123, China*

*<sup>3</sup>Suzhou Foreign Language School, Suzhou, 215011, China*

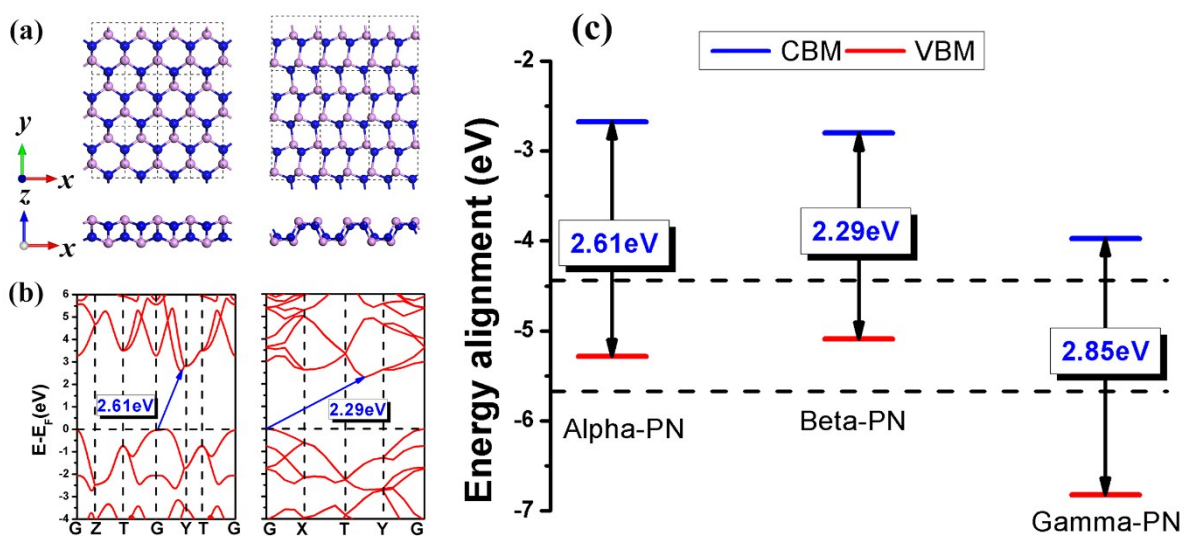

Figure S1. (a) The top view and side view of  $\alpha$ - and  $\beta$ -PN nanosheet and (b) the corresponding band structure. (c) The energy level alignment comparison among three types of phosphorus nitride nanosheet relative the vacuum level.

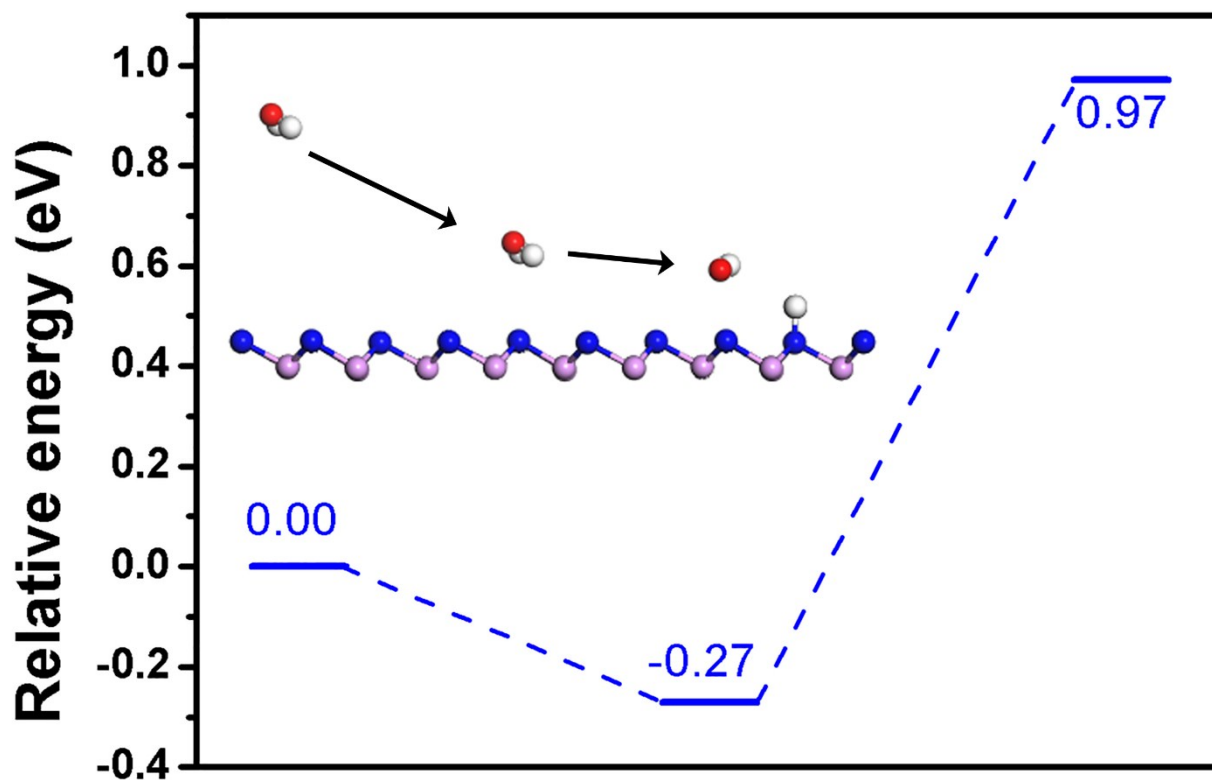

Figure S2. The water decomposition mechanism of  $H_2O$  on 2D  $\gamma$ -PN monolayer.
